# Supplementary material for: Reaction dynamics of P( 4 S) + O 2 (X 3 Σ - ) → O( 3 P) + PO(X 2 Π) on a global CHIPR potential energy surface of PO 2 (X 2 A 1 ): implication for atmospheric modelling
Source: Copernicus journal article supplement (doi:10.5194/egusphere-2023-1019), 2023-05-22
Supplement: Supplementary file 1 [file Supplement.pdf › Supplement/Supplement.pdf]

# Reaction dynamics of $\text{P}(^4\text{S}) + \text{O}_2(\text{X } ^3\Sigma^-) \rightarrow \text{O}(^3\text{P}) + \text{PO}(\text{X } ^2\Pi)$ on a global CHIPR potential energy surface of $\text{PO}_2(\text{X } ^2\text{A}_1)$ : implication for atmospheric modelling

Guangan Chen<sup>1</sup>, Zhi Qin<sup>\*12</sup>, Ximinng Li<sup>1</sup>, Linhua Liu<sup>\*123</sup>

<sup>1</sup>School of Energy and Power Engineering, Shandong University, 250061, Jinan, China.

<sup>2</sup>Optics and Thermal Radiation Research Center, Institute of Frontier and Interdisciplinary Science, Shandong University, 266237, Qingdao, China

<sup>3</sup>School of Energy Science and Engineering, Harbin Institute of Technology, 150001, Harbin, China

Correspondence to: Zhi Qin ([z.qin@sdu.edu.cn](mailto:z.qin@sdu.edu.cn)) and Linhua Liu ([liulinhua@sdu.edu.cn](mailto:liulinhua@sdu.edu.cn))

## S1 Supplement of TDWP calculations

Table S1 displays the parameters used in the TDWP calculations. The  $J$ -shifting method was used in the calculation and the reaction probabilities of  $J = 0$  to 270 were obtained.

**Table S1 Parameters used in the TDWP calculations. All parameters are given in atomic units, except for the numbers of quantities or indicated otherwise.**

| Parameter                                              | Value       |
|--------------------------------------------------------|-------------|
| Scattering coordinate ( $R$ ) range                    | 0.01-13     |
| Number of translational basis functions                | 450         |
| Internal coordinate ( $r$ ) range                      | 1.6-9.6     |
| Number of vibrational basis functions                  | 285         |
| Number of rotational basis functions                   | 150         |
| Absorption region length in $R / r$                    | 3.0 / 3.0   |
| Absorption strength in $R / r$                         | 0.03 / 0.03 |
| Center of initial wave packet on scattering coordinate | 9.5         |
| K-block                                                | 2           |
| Propagation time                                       | 50000       |
| Time step for propagation                              | 10          |

## S2 Supplement of fitting rate constants

The constant rate constants of TDWP ( $v = 0, j = 0$ ), QCT ( $v = 0, j = 0$ ) and QCT (Thermal) for the  $\text{P}(^4\text{S}) + \text{O}_2(\text{X } ^3\Sigma^-) \rightarrow \text{O}(^3\text{P}) + \text{PO}(\text{X } ^2\Pi)$  reaction can be approximated using the three-parameter Kooij function (within 1 per cent), which is expressed as

$$k(T) = A \left( \frac{T}{300} \right)^\alpha e^{-\beta/T} \quad (\text{S1})$$

where  $A$ ,  $\alpha$ , and  $\beta$  are fitting parameters. The rate constant curves are divided into four temperature ranges, and the fitting parameters are summarized in Table S2. The fitted rate constants deviate less than 1 per cent from our calculated ones.

**Table S2 Parameters according to Kooij function for the rate constants.**

| Method                  | $T / \text{K}$ | $A / \text{cm}^3\text{s}^{-1}$ | $\alpha$ | $\beta / \text{K}$ |
|-------------------------|----------------|--------------------------------|----------|--------------------|
| TDWP ( $v = 0, j = 0$ ) | 200 - 600      | $2.2508 \times 10^{-12}$       | 1.3554   | 1041.9940          |
|                         | 600 - 1000     | $4.4682 \times 10^{-12}$       | 0.9430   | 1283.2565          |
|                         | 1000 - 2000    | $8.6398 \times 10^{-12}$       | 0.6532   | 1596.5685          |
|                         | 2000 - 5000    | $6.7105 \times 10^{-11}$       | -0.0146  | 3193.4739          |
| QCT (Thermal)           | 200 - 600      | $4.7988 \times 10^{-13}$       | 2.5132   | 734.5248           |
|                         | 600 - 1000     | $6.7196 \times 10^{-12}$       | 0.7068   | 1574.9928          |
|                         | 1000 - 2000    | $6.7933 \times 10^{-12}$       | 0.7215   | 1610.7254          |
|                         | 2000 - 5000    | $2.0656 \times 10^{-12}$       | 1.0844   | 590.6460           |
| QCT ( $v = 0, j = 0$ )  | 2000 - 5000    | $5.7104 \times 10^{-11}$       | 0.0244   | 3237.2285          |
